# Supplementary material for: Plant-Mediated Synthesis of Ni-Doped CuO and Fe2O3 Nanocomposite for Photodegradation of Methylene Blue Dye
Source: Hindawi journal article supplement (doi:10.1155/2023/3678679), 2023-04-25
Supplement: f1 [file 3678679.f1.docx]

**Supplementary Materials**

**Plant-mediated Synthesis of Ni-doped CuO and Fe2O3 Nanocomposite for Photo Degradation of Methylene Blue Dye**

Ermias Tafa Debelea, Temesgen Debelo Desissaa, Osman Ahmed Zelekewa, Fetene Fufa Bakarea,b, Gebisa Bekele Feyisaa and Tadele Hunde Wondimu a,b*

a Department of Materials Science and Engineering, Adama Science and Technology University, Adama P.O. Box 1888, Ethiopia

bCenter of excellence, advanced materials Science and engineering at Adama Science and Technology University

* Correspondence authors: [tadele.hunde@astu.edu.et](mailto:tadele.hunde@astu.edu.et) and [tadechem@gmail.com](mailto:tadechem@gmail.com)

**Experimental part**

# **Materials, Methods, and Characterizations**

## **Materials**

Copper Nitrate Hexahydrate (Cu(NO3)2.6H2O) (Loba Chem, 96%, India), Nickel Nitrate Hexahydrate (Ni(NO3)2.6H2O) (Loba Chem 98%, India), Iron Nitrate Hexahydrate (Fe(NO3)2.6H2O) (Loba Chem, 97%, India), Sodium Hydroxide (NaOH) (Loba chem, 95%, New Delhi) and Methylene Blue (Carelabmed Chem, India). For all syntheses, distilled water and ethanol were employed. The filter paper was employed for filtration of *Acmella Ciliate* plant leaves obtained from Arbaminch, Ethiopia.

## **Methods**

### **Preparation of plant extract**

Plant extract was prepared by taking 2 gram fresh leaves of *Acmella Ciliate* plant and washed with deionized water several times to remove unwanted materials incorporated into the leaf followed by washed leaf was mixed into 100 ml of deionized water. Then the mixture was heated and stirred at 70 ⁰C for 30 min and the mixture was placed at room temperature until cool down. After the mixture was cold down, the solution was faltered by filter paper. The obtained solution was stored at 4 ⁰C for further studies1*.*

### **Biosynthesis of CuO**

CuO was prepared in 100 ml of a plant extract by using a 1 M Cu(NO3)2.3H2O solution, which was stirred for 30 min at 70 °C. Freshly prepared 0.4 M NaOH was dissolved into 100 ml distilled water and added drop wisely into the solution until the pH of the solution reaches 12 then, the resulting solution was stirred for another 2 h. After 2 h, the solution precipitated at room temperature after being left for 12 h and the obtained precipitate was washed and dried then the resulting powder was calcined at 400 ⁰C for 2 h named p-CuO2. Plant extracted synthesized CuO was doped with 1 up to 4 % of nickel concentrations. A similar procedure was used to synthesize nickel doped copper oxide without plant extracted as shown in Table S13.

### **Biosynthesis of Fe2O3**

Fe(NO3)2.6H2O and NaOH were used for synthesizing Fe2O3 powder. 0.1 M Fe(NO3)2.6H2O was typically dissolved in 100 ml of plant extract, and 0.2 M NaOH was dissolved in 100 ml of deionized water. A 0.2 M of NaOH was added to the solution drop wise until the pH of the solution reached 12. After that, the mixture was stirred for another 2 hours at 50 °C followed by washing and drying powder. Then, the prepared powder was calcined for 3 h at 550 °C to obtain Fe2O3 power4.

### **Synthesis of 2NCO/FO**

To synthesize composites of 2NCO/10FO, 2NCO/20FO, 2NCO/30FO, 2NCO/40FO, and 2NCO/50FO the composites was dissolved into 100 ml of plant extract. In each prepared composite 0.2 M NaOH solution was added drop wise until the pH of the solution reached 12 at 50 °C after 2 h with continuous stirring. Then the mixture was placed for 12 h to get the mixed precipitated and finally, the obtained powder were calcined at 550 ⁰C for 3 h 5.

**Table s1** Different percentage of doped Ni to CuO

| Name of Samples | Percentage of composition |
| --- | --- |
| 1NCO | 1% Ni and 99% CuO |
| 2NCO | 2% Ni and 98% CuO |
| 3NCO | 3% Ni and 97% CuO |
| 4NCO | 4% Ni and 96% CuO |

**Table s2.** Percent of the compositions of plant extracted Ni-doped CuO and Fe2O3

| Name of Samples | Percent composition of CuO and Fe2O3 |
| --- | --- |
| 2NCO/10FO | 2NCO (90%)/Fe2O3(10%) |
| 2NCO/20FO | 2NCO (80%)/F2O3(20%) |
| 2NCO/30FO | 2NCO (70%)/Fe2O3(30%) |
| 2NCO/40FO | 2NCO (60%)/Fe2O3(40%) |
| 2NCO/50FO | 2NCO (50%)/Fe2O3(50%) |

## **Materials Characterizations**

The prepared CuO, *p*-CuO, Fe2O3, 1NCO, 2NCO, 3NCO, 4NCO 2NCO/10FO, 2NCO/20FO, 2NCO/30FO, 2NCO/40FO, and 2NCO/50FO were studied by various techniques using XRD to examine the phase purity. TGA-DTA was used to investigate the thermal stability. The morphology of samples was also examined using SEM. The FTIR spectrum is to identify functional group. The BET strives to explain the physical adsorption of gas molecules on a solid surface and provides specific surface area. The visible light absorbance property was estimated using (UV-3600Plus). The PL was measured the spontaneous emission of light from under optical excitation. The excitation energy and intensity are chosen to investigate different locations and excitation concentrations in the sample. The interface charge separation determined by EIS. After the photocatalytic experiment, the absorbance of the MB dye was measured using UV-visible spectroscope.

## **Photocatalytic activity study**

Using visible light, the photocatalytic performance of the 25 mg of catalyst dissolved into 100 ml of 10 ppm MB solution concentration. A 6 ml solution was taken after the solution was stirred in the dark for about 30 min to achieve adsorption-desorption equilibrium between a catalyst and a contaminant. Following the development of equilibrium, the light was irradiated into the suspension as it was continually stirred, and 6 ml of solution was taken for analysis up to 120 min. Finally, residue left pollutant concentrations were determined using UV-visible spectroscopy, and the concentration (Ct) was calculated using the Beer-Lambert rule from the absorbance versus wavelength plot, as shown in equation 1.

Where A denotes absorbance, denotes absorptivity, b denoted the length of the light path, and Ct is the MB concentration after time‘t’.

1. **Surface area Characterizations (BET)**

The Brunauer-Emmett-Teller (BET) method is commonly used to compute the specific surface area based on nitrogen adsorption isotherm observations at 77 K. Table 3 shows the surface areas, pore volumes, and average pore diameters of the obtained samples CuO, P-CuO, Fe2O3, and 2NCO/40FO BET. The surface area and pore volume of copper oxide made with plant extract show better surface area and pore volume than copper oxide without plant extract. The surface area and pore volume of Fe2O3 and 2NCO/40FO were better than copper oxide. The blocking surface of the produced samples by associated organic compounds from the plant extract could explain the increase in specific surface area and pore volume. The result shows that CuO, *p-*CuO, Fe2O3, and 2NCO/40FO show similar pore size. The greater the surface area, and pore volume the greater the number of active sites for molecule adsorption. As a result, it was eventually produce an effective photo catalysis6.

**Table s3** The Surface area, pore volume, and pore size of CuO, p-CuO, Fe2O3, and 2NCO/40FO.

| Name of sample | Surface area (m2/g) | Pore Volume(cm3/g) |  |
| --- | --- | --- | --- |
| CuO | 223.667 | 0.0727 |  |
| p-CuO | 246.508 | 0.0747 |  |
| Fe2O3 | 257.692 | 0.0755 |  |
| 2NCO/40FO | 263.909 | 0.0780 |  |

**Figure s1.** UV-Vis absorption spectra of MB solution at different time durations light exposure of (a) 1NCO, (b) 3NCO, and (c) 4NCO

**Figure s2.** UV-Vis absorption spectra of MB solution at different time durations light exposure of (a) 2NCO/10FO, (b) 2NCO/20FO, (c) 2NCO/30FO, and (d) 2NCO/50FO; the degradation performance of MB

References

(1) Parvathiraja, C.; Shailajha, S. Bioproduction of CuO and Ag/CuO heterogeneous photocatalysis-photocatalytic dye degradation and biological activities. *Applied Nanoscience* 2021, *11*, 1411-1425.

(2) Siddiqui, H.; Qureshi, M. S.; Haque, F. Z. Biosynthesis of Flower-Shaped CuO Nanostructures and Their Photocatalytic and Antibacterial Activities. *Nano-Micro Letters* 2020, *12*, 29.

(3) George, A.; Raj, D. M. A.; Venci, X.; Raj, A. D.; Irudayaraj, A. A.; Josephine, R.; Sundaram, S. J.; Al-Mohaimeed, A. M.; Al Farraj, D. A.; Chen, T.-W. Photocatalytic effect of CuO nanoparticles flower-like 3D nanostructures under visible light irradiation with the degradation of methylene blue (MB) dye for environmental application. *Environmental Research* 2022, *203*, 111880.

(4) Kang, Y. S.; Risbud, S.; Rabolt, J. F.; Stroeve, P. Synthesis and characterization of nanometer-size Fe3O4 and γ-Fe2O3 particles. *Chemistry of Materials* 1996, *8*, 2209-2211.

(5) Parvathiraja, C.; Shailajha, S.; Shanavas, S.; Gurung, J. Biosynthesis of silver nanoparticles by Cyperus pangorei and its potential in structural, optical and catalytic dye degradation. *Applied Nanoscience* 2021, *11*, 477-491.

(6) Mohammadi-Aloucheh, R.; Habibi-Yangjeh, A.; Bayrami, A.; Latifi-Navid, S.; Asadi, A. Enhanced anti-bacterial activities of ZnO nanoparticles and ZnO/CuO nanocomposites synthesized using Vaccinium arctostaphylos L. fruit extract. *Artificial Cells, Nanomedicine, and Biotechnology* 2018, *46*, 1200-1209.
